# Supplementary material for: Antibiotic treatment of acute and recurrent otitis media in children: an Italian intersociety Consensus
Source: Springer Nature journal article supplement (doi:10.1186/s13052-025-01894-z), 2025-02-20

## **S1. ACUTE OTITIS MEDIA (AOM)**

### **PICOs**

***Question 1: Does the child's age influence the type of therapeutic strategy to adopt in AOM?***

**P** In children under 24 months of age diagnosed with AOM

**I** does watchful waiting

**C** compared with immediate antibiotic therapy

**O1** delay the resolution of symptoms?

**O2** alter the risk of suppurative complications?

**O3** increase the risk of short-term relapse?

**O4** increase the risk of RAOM?

***Question 2: Does the severity of the AOM episode have an effect on the timing of antibiotic treatment?***

**P1** In children diagnosed with AOM and fever  $>39^{\circ}\text{C}$

**P2** In children diagnosed with AOM and otorrhoea

**P3** In children diagnosed with AOM and impaired general condition

**P4** In children diagnosed with bilateral AOM

**I** does the watchful waiting strategy

**C** compared with immediate antibiotic therapy

**O1** delay the resolution of symptoms?

**O2** alter the risk of suppurative complications?

**O3** increase the risk of short-term relapse?

**O4** increase the risk of RAOM?

***Question 3: If antibiotic therapy is necessary, can amoxicillin still be considered the first choice in children with acute otitis media?***

**P** In a child with AOM requiring antibiotic therapy

**I** does the use of amoxicillin versus

**C1** amoxicillin/clavulanate

**C2** 2nd generation cephalosporins

**C3** 3rd generation cephalosporins

**C4** macrolides

**O1** reduce the cure rate

**O2** alter the risk of suppurative complications?

**O3** increase the risk of short-term relapse?

**O4** increase the risk of RAOM?

***Question 4: Is the use of amoxicillin at a dose of 80-90 mg/kg per day more effective than the use of amoxicillin at a dose of 50 mg/kg per day?***

**P** In children with AOM

**I** is the use of amoxicillin at a dose of 80-90 mg/kg per day

- C compared with a dose of 50 mg/kg per day
- O1** equally effective in achieving a cure?
  - O2** alter the risk of suppurative complications?
  - O3** increase the risk of short-term relapse?
  - O4** increase the risk of RAOM?

**Question 5: Should amoxicillin or amoxicillin/clavulanate therapy be divided into 2 or 3 daily doses?**

- P** In children with AOM
- I1** does fractionation of amoxicillin therapy into two daily doses
  - I2** does fractionation of amoxicillin/clavulanate therapy into two daily doses
- C compared with fractionation into three daily doses
- O1** increase therapeutic adherence?
  - O2** increase the risk of treatment failure?
  - O3** increase the risk of suppurative complications?
  - O4** increase the risk of short-term relapse?
  - O5** increase the risk of RAOM?

**Question 6: For children with AOM, is a 5-day or 10-day course of antibiotics more effective?**

- P1** In children with AOM and age < 24 months
- P2** In children with AOM and age ≥ 24 months
- I1** does a duration of antibiotic therapy of 5 days
  - I2** does a duration of antibiotic therapy of 7 days
- C compared with a duration of more than 10 days
- O1** increase therapeutic adherence?
  - O2** increase the risk of therapeutic failure?
  - O3** increase the risk of suppurative complications?
  - O4** increase the risk of short-term relapse?
  - O5** increase the risk of RAOM?
  - O6** reduce the risk of adverse events (allergic/ urticarial reactions, antibiotic diarrhea, etc.)?

**Question 7: Which antibiotic is recommended for children with AOM who do not recover or who have a short-term relapse after amoxicillin therapy at 80-90mg/kg/day?**

- P** In children with AOM who do not recover or who have a short-term relapse after amoxicillin therapy at 80-90mg/kg/day
- I1** is therapy with 2nd generation cephalosporins
  - I2** is therapy with 3rd generation cephalosporins
  - I3** is therapy with macrolides
  - I4** is therapy with quinolones
- C compared with amoxicillin/clavulanate therapy
- O1** more effective in achieving a cure?
  - O2** more effective in reducing the risk of short-term relapse?
  - O3** more effective in reducing the risk of RAOM?
  - O4** more effective in reducing the risk of suppurative complications?

**Question 8: What is the antibiotic therapy of first choice for an episode of AOM in children with RAOM?**

**P** In children with RAOM

**I** is antibiotic therapy with a different antibiotic

**C** compared with first-choice antibiotic amoxicillin or second-choice antibiotic

amoxicillin/clavulanate (worsening of symptoms with first-choice therapy taken for at least 2 or 3 days)

**O1** more effective in achieving a cure?

**O2** more effective in reducing the risk of short-term relapse?

**O3** most effective in reducing the risk of RAOM?

**O4** most effective in reducing the risk of suppurative complications?

**Question 9: In children with RAOM, is the use of antibiotic prophylaxis effective in reducing the recurrence of episodes?**

**P** In children with RAOM, is treatment with

**I1** long-term antibiotic prophylaxis with amoxicillin or amoxicillin/clavulanate or

**I2** long-term antibiotic prophylaxis with other antibiotics (e.g. macrolides, co-trimoxazole)

**C** versus antibiotic treatment of each episode

**Or** more effective in reducing the recurrence of episodes?

**Question 10: Which antibiotics can be used to treat AOM/RAOM in children who are allergic to penicillin?**

**P** In penicillin-allergic children with AOM/RAOM,

**I** is therapy with

**I1** 2nd generation cephalosporins or

**I2** 3rd generation cephalosporins or

**I3** quinolones

**C** compared with macrolides

**O1** equally/more effective in achieving a cure?

**O2** equally/more effective in reducing the risk of short-term relapse?

**O3** equally/more in reducing the risk of RAOM?

**O4** equally/more in reducing the risk of suppurative complications?

**Question 11: Are antibiotics given parenterally, specifically intramuscularly, more effective than amoxicillin/amoxicillin-clavulanic acid given orally (po) in treating AOM?**

**P** In children with AOM

**I** is therapy with antibiotics by injection (ceftriaxone or other cephalosporins i.m.)

**C** compared with therapy with amoxicillin/amoxicillin-clavulanic acid po

**O1** significantly more effective and faster in achieving a cure?

**O2** significantly more effective in reducing the risk of short-term relapse?

**O3** significantly more effective in reducing the risk of RAOM?

**O4** significantly more effective in reducing the risk of suppurative complications?

**Question 12: Can topical antibiotics be useful in the treatment of acute perforated otitis media?**

**P** In children with AOM and otorrhea

**I** is combined topical and oral therapy

**C** compared with oral therapy alone

**O1** more effective in achieving a cure?

**O2** more effective in reducing the risk of short-term relapse?

**O3** more effective in reducing the risk of RAOM?

**O4** more effective in reducing the risk of suppurative complications?

**Question 13: In acute perforated otitis media, is an antibiotic other than amoxicillin indicated?**

**P** In children with perforated AOM

**I1** is amoxicillin-clavulanic acid or

**I2** cephalosporin or

**I3** quinolone

**C** compared to amoxicillin

**O1** more effective in achieving a cure?

**O2** more effective in reducing the risk of short-term relapse?

**O3** more effective in reducing the risk of RAOM?

**O4** more effective in reducing the risk of suppurative complications?

## S1.1. GRADE ADOLOPMENT

Translated by: *Journal of Clinical Epidemiology* 2017 81, 101-110 DOI: 10.1016/j.jclinepi.2016.09.00

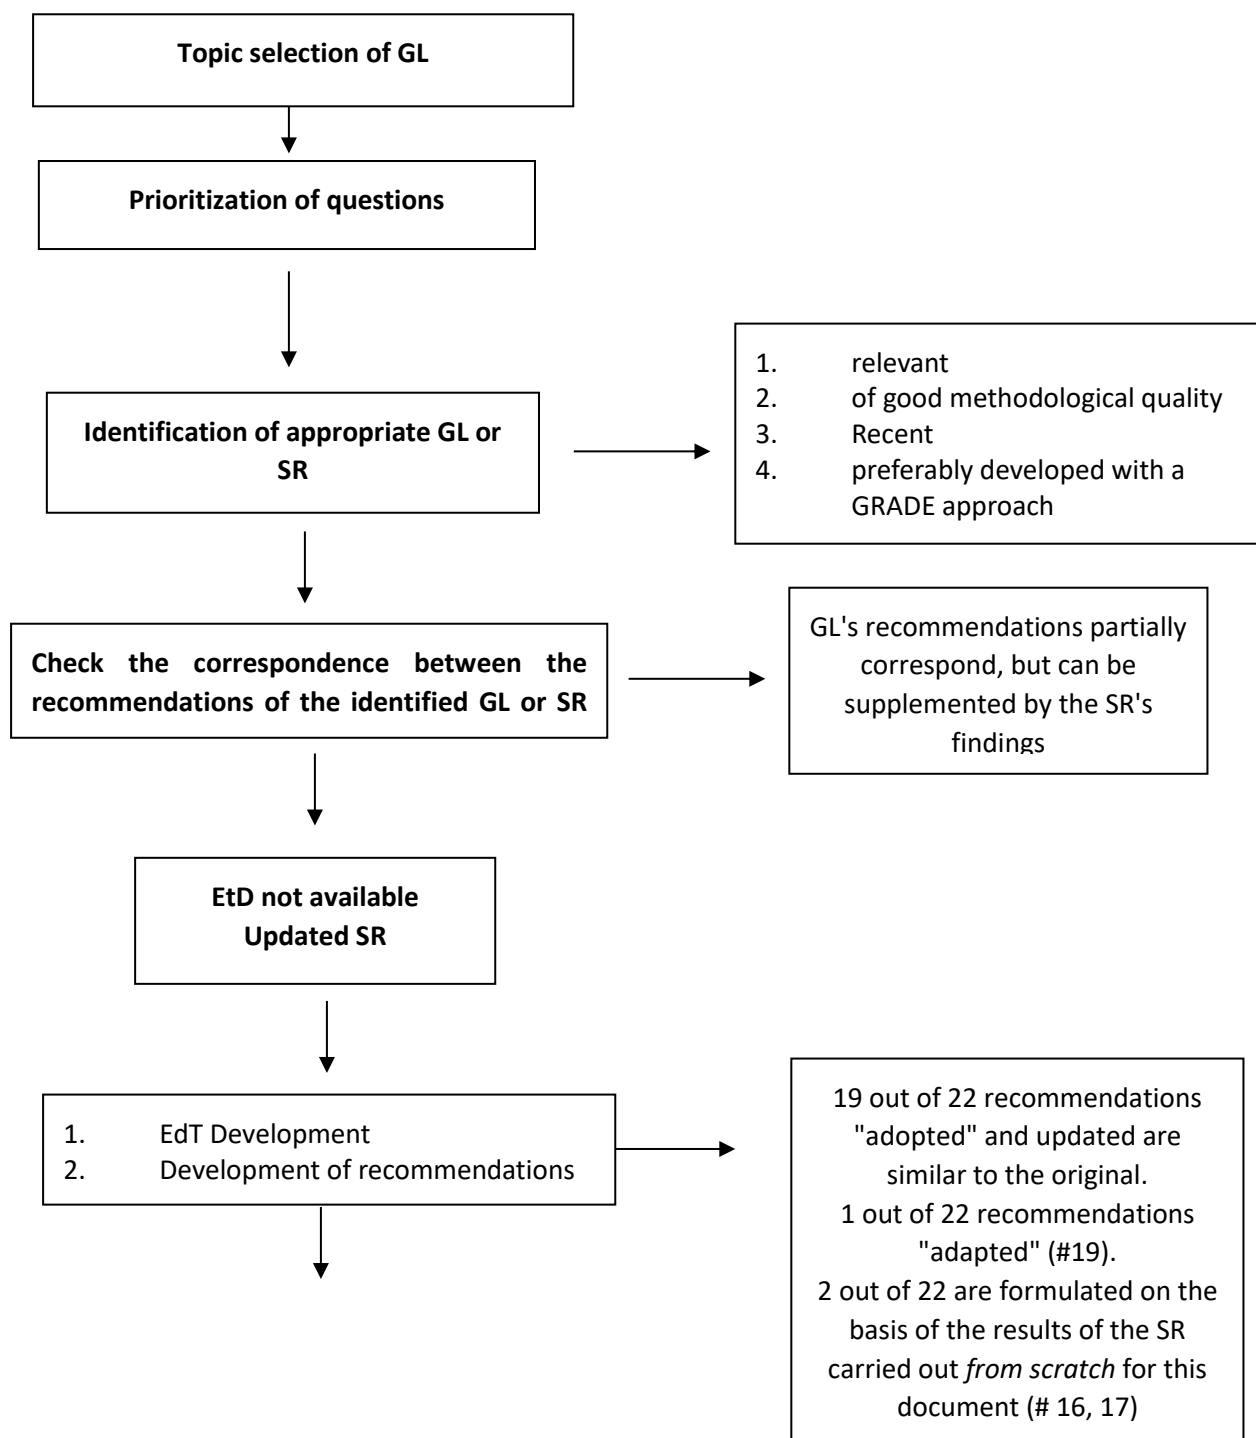

## KEYWORDS

### Population

- A. 0-18 years old
- B. infant, child, adolescent

### Exposure factors/Comparison

- A. Anti-bacterial agents
- B. Amoxicillin
- C. amoxicillin potassium clavulanate
- D. Penicillin
- E. Benzylpenicillin
- F. Cephalosporins
- G. Macrolides
- H. Cefuroxime
- I. Erythromycin
- J. Azithromycin
- K. Clarithromycin
- L. Sulfamethoxazole drug combination
- M. Trimethoprim
- N. Administration
- O. Dosage

### Outcomes

- A. otitis media
- B. acute otitis media
- C. middle ear effusion
- D. middle ear inflammation
- E. middle ear infection
- F. otitis media with effusion
- G. glue ear
- H. otorrhea
- I. earache
- J. ear pain
- K. adverse effects

## Guidelines search

*Time interval:* 2017-2022

UPTODATE <https://www.uptodate.com/home>

### Society Guideline Links

SNLG <https://snlg.iss.it/>

National Guideline Centre (NGC) - National Institute of Health and Care Excellence (NICE)  
<https://www.rcplondon.ac.uk/about-us/what-we-do/national-guideline-centre-ngc>

Australian Clinical Practice Guidelines (ACPG) <https://www.clinicalguidelines.gov.au/>  
MJA (Medical Journal of Australia) Clinical Guidelines <https://www.mja.com.au/journal/guidelines>  
Canadians Medical Association (CMA) <https://www.cma.ca/clinicalresources/practiceguidelines>  
G-I-N Guidelines International Network <https://g-i-n.net/>  
New Zealand Guidelines Group (NZGG) <https://www.health.govt.nz/about-ministry/ministry-health-websites/new-zealand-guidelines-group>  
Scottish Intercollegiate Guidelines Network (SIGN) <https://www.sign.ac.uk/our-guidelines.html>  
Guidelines Central <https://www.guidelinecentral.com/>  
Società Italiana di Pediatria (SIP) <http://www-sip.it/>  
Società Italiana di Pediatria Preventiva e Sociale (SIPPS) <https://www.sipps.it/>  
American Academy of Pediatrics (AAP) <https://www.aap.org/en-us/Pages/Default.aspx>  
European Paediatric Association /Union of National European Paediatric Societies and Associations  
EPA-UNEPSA <http://www.epa-une psa.org/>

**PubMed** <https://www.ncbi.nlm.nih.gov/pubmed/>

("Otitis Media"[MeSH Terms] OR "acute otitis media"[All Fields] AND ((Practice Guideline[ptyp] OR Guideline[ptyp]) AND "2017/06/30"[PDat] : "2022/06/30"[PDat] AND (allchild[Filter]))

**EMBASE** <https://www.embase.com>

('acute otitis media'/exp OR 'acute otitis media' AND 'practice guideline'/de AND ([adolescent]/lim OR [child]/lim OR [infant]/lim OR [newborn]/lim OR [preschool]/lim OR [school]/lim) AND [2017-2022]/py

## **Systematic Review Search**

*Time interval: 2016-2022*

**PubMed** <https://www.ncbi.nlm.nih.gov/pubmed/>

("Otitis Media"[MeSH Terms] OR "acute otitis media"[All Fields] OR "middle ear inflammation"[All Fields] OR "middle ear infection"[All Fields] OR "glue ear"[All Fields] OR "otorrhea"[All Fields] OR ("Earache"[MeSH Terms] OR "ear pain"[All Fields] OR ("ear"[MeSH Terms] OR "ear"[All Fields]) AND ("pain"[MeSH Terms] OR "pain"[All Fields] OR "aches"[All Fields] OR "aching"[All Fields]))) AND ((meta-analysis[Filter] OR systematicreview[Filter]) AND (2016/12/01:2022/6/30[pdat]) AND (allchild[Filter]))

**EMBASE** <https://www.embase.com>

('otitis media' OR 'acute otitis media'/exp) AND ([systematic review]/lim OR [meta analysis]/lim) AND ([adolescent]/lim OR [child]/lim OR [infant]/lim OR [newborn]/lim OR [preschool]/lim OR [school]/lim) AND [2016-2022]/py

**Studies search** (since the closure of the research in the guidelines evidence-based NICE 2018)

Time interval: 2016-2022

**PubMed** <https://www.ncbi.nlm.nih.gov/pubmed/>

("Otitis Media"[MeSH Terms] OR "acute otitis media"[All Fields] OR ("middle ear"[All Fields] OR "middle ear effusion"[All Fields] OR "middle ear inflammation"[All Fields] OR "middle ear infection"[All Fields]) OR ("otitis media with effusion"[MeSH Terms] OR ("otitis"[All Fields] AND "media"[All Fields] AND "effusion"[All Fields]) OR "otitis media with effusion"[All Fields] OR ("glue"[All Fields] AND "ear"[All Fields]) OR "glue ear"[All Fields]) OR ("otorrhea"[All Fields] OR "otorrhoea"[All Fields]) OR ("Earache"[MeSH Terms] OR "ear pain"[All Fields] OR ("ear"[MeSH Terms] OR "ear"[All Fields]) AND ("pain"[MeSH Terms] OR "pain"[All Fields] OR "aches"[All Fields] OR "aching"[All Fields])))

AND (("Anti-Bacterial Agents"[Mesh]) OR ("amoxicillin"[MeSH Terms] OR "amoxicillin"[All Fields] OR "amoxicilline"[All Fields] OR "amoxicillins"[All Fields] OR ("cefuroxime"[MeSH Terms] OR "cefuroxime"[All Fields] OR "cefuroxim"[All Fields]) OR ("erythromycin"[MeSH Terms] OR "erythromycin"[All Fields] OR "erythromycins"[All Fields] OR "erythromycine"[All Fields]) OR ("azithromycin"[MeSH Terms] OR "azithromycin"[All Fields] OR "azithromycine"[All Fields] OR "azithromycin s"[All Fields]) OR ("clarithromycin"[MeSH Terms] OR "clarithromycin"[All Fields] OR "clarithromycine"[All Fields]) OR ("amoxicillin potassium clavulanate combination"[MeSH Terms] OR ("amoxicillin potassium"[All Fields] AND "clavulanate"[All Fields] AND "combination"[All Fields]) OR "amoxicillin potassium clavulanate combination"[All Fields] OR ("amoxicillin"[All Fields] AND "potassium"[All Fields] AND "clavulanate"[All Fields] AND "combination"[All Fields]) OR "amoxicillin potassium clavulanate combination"[All Fields]) OR ("amoxicillin\*" [All Fields] OR "amix"[All Fields] OR ("amoxicillin"[MeSH Terms] OR "amoxicillin"[All Fields] OR "amoxil"[All Fields])) OR ("cefuroxime\*" [All Fields] OR ("cefuroxime"[MeSH Terms] OR "cefuroxime"[All Fields] OR "zinacef"[All Fields]) OR ("cefuroxime axetil"[Supplementary Concept] OR "cefuroxime axetil"[All Fields] OR "zinnat"[All Fields])) OR ("erythromycin\*" [All Fields] OR ("buserelin"[MeSH Terms] OR "buserelin"[All Fields] OR "tiloryth"[All Fields]) OR "primacine"[All Fields] OR ("erythromycin"[MeSH Terms] OR "erythromycin"[All Fields] OR "erymax"[All Fields]) OR ("erythrocin"[All Fields] OR "erythromycin"[MeSH Terms] OR "erythromycin"[All Fields] OR "erythromycins"[All Fields] OR "erythromycine"[All Fields]) OR ("erythromycin ethylsuccinate"[MeSH Terms] OR ("erythromycin"[All Fields] AND "ethylsuccinate"[All Fields]) OR "erythromycin ethylsuccinate"[All Fields] OR "erythroped"[All Fields]) OR ("erythromycin ethylsuccinate"[MeSH Terms] OR ("erythromycin"[All Fields] AND "ethylsuccinate"[All Fields]) OR "erythromycin ethylsuccinate"[All Fields] OR "erythroped"[All Fields])) OR ("azithromycin\*" [All Fields] OR ("azithromycin"[MeSH Terms] OR "azithromycin"[All Fields] OR "azithromycine"[All Fields] OR "zithromax"[All Fields] OR



"azithromycin s"[All Fields])) OR ("clarithromycin"[All Fields] OR "klaricid"[All Fields] OR "XL"[All Fields] OR ("amoxicillin potassium clavulanate combination"[MeSH Terms] OR ("amoxicillin potassium"[All Fields] AND "clavulanate"[All Fields] AND "combination"[All Fields]) OR "amoxicillin potassium clavulanate combination"[All Fields] OR "coamoxiclav"[All Fields]) OR "co-amoxiclav"[All Fields] OR ("amoxicillin"[MeSH Terms] OR "amoxicillin"[All Fields] OR "amoxicilline"[All Fields] OR "amoxicillin potassium clavulanate combination"[MeSH Terms] OR ("amoxicillin potassium"[All Fields] AND "clavulanate"[All Fields] AND "combination"[All Fields]) OR "amoxicillin potassium clavulanate combination"[All Fields] OR "augmentin"[All Fields] OR "amoxicillins"[All Fields] OR "augmentine"[All Fields] OR "clavulanic acid"[MeSH Terms] OR ("clavulanic"[All Fields] AND "acid"[All Fields]) OR "clavulanic acid"[All Fields] OR "clavulanate"[All Fields] OR "clavulanic"[All Fields])) OR ("trimethoprim, sulfamethoxazole drug combination"[MeSH Terms] OR ("trimethoprim"[All Fields] AND "sulfamethoxazole"[All Fields] AND "drug"[All Fields] AND "combination"[All Fields]) OR "sulfamethoxazole drug combination trimethoprim"[All Fields] OR ("trimethoprim"[All Fields] AND "sulfamethoxazole"[All Fields] AND "drug"[All Fields] AND "combination"[All Fields]) OR "trimethoprim sulfamethoxazole drug combination"[All Fields] OR ("cotrimoxazol"[All Fields] OR "trimethoprim, sulfamethoxazole drug combination"[MeSH Terms] OR ("trimethoprim"[All Fields] AND "sulfamethoxazole"[All Fields] AND "drug"[All Fields] AND "combination"[All Fields]) OR "sulfamethoxazole drug combination trimethoprim"[All Fields] OR "cotrimoxazole"[All Fields] OR "Co-trimoxazole"[All Fields] OR ("trimethoprim, sulfamethoxazole drug combination"[MeSH Terms] OR ("trimethoprim"[All Fields] AND "sulfamethoxazole"[All Fields] AND "drug"[All Fields] AND "combination"[All Fields]) OR "sulfamethoxazole drug combination trimethoprim"[All Fields] OR "septrin"[All Fields])))) OR ("macrolid"[All Fields] OR "macrolides"[MeSH Terms] OR "macrolides"[All Fields] OR "macrolide"[All Fields] OR "macrolids"[All Fields]) OR "macrolide"[All Fields] OR ("benzylpenicillins"[All Fields] OR "penicillin g"[MeSH Terms] OR "penicillin g"[All Fields] OR "benzylpenicillin"[All Fields] OR "penicilline"[All Fields] OR "penicillines"[All Fields] OR "penicillins"[MeSH Terms] OR "penicillins"[All Fields] OR "penicillin"[All Fields]) OR "penicillin"[All Fields] OR ("cephalosporine"[All Fields] OR "cephalosporines"[All Fields] OR "cephalosporins"[MeSH Terms] OR "cephalosporins"[All Fields] OR "cephalosporin"[All Fields] OR "cephalosporin"[All Fields])

AND ((2016/12/01:2022/6/30[pdat])

AND (allchild[Filter]))

AND ((controlledclinicaltrial[Filter] OR randomizedcontrolledtrial[Filter]))

**EMBASE <https://www.embase.com>**

('otitis media' OR 'acute otitis media'/exp) AND ('antibiotic agent'/exp OR 'antibiotic therapy'/exp) AND ([randomized controlled trial]/lim OR 'controlled clinical trial'/de) AND ([adolescent]/lim OR [child]/lim OR [infant]/lim OR [newborn]/lim OR [preschool]/lim OR [school]/lim) AND [2016-2022]/py

## S1.2. Algorithm for Guidelines search

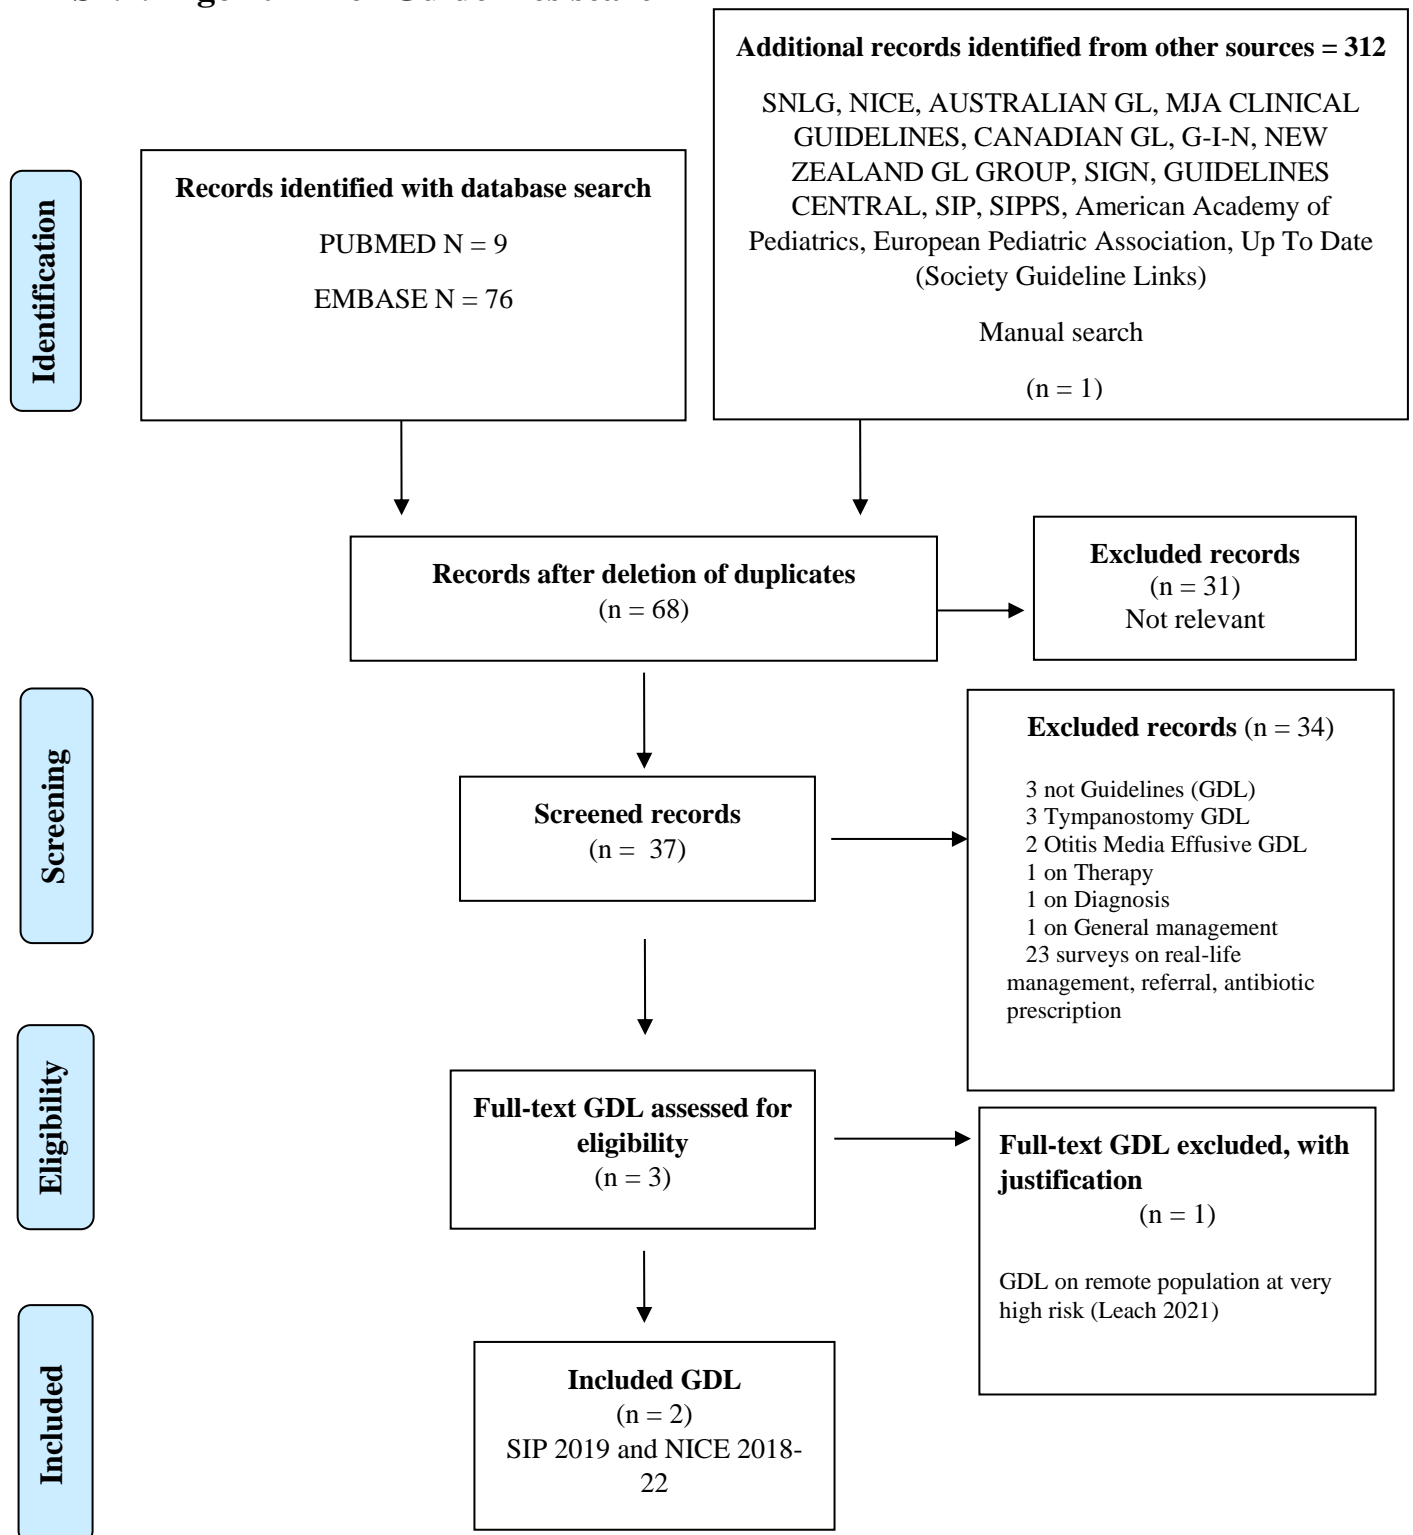

**S1.3. Algorithm for Systematic Review (SR) search**

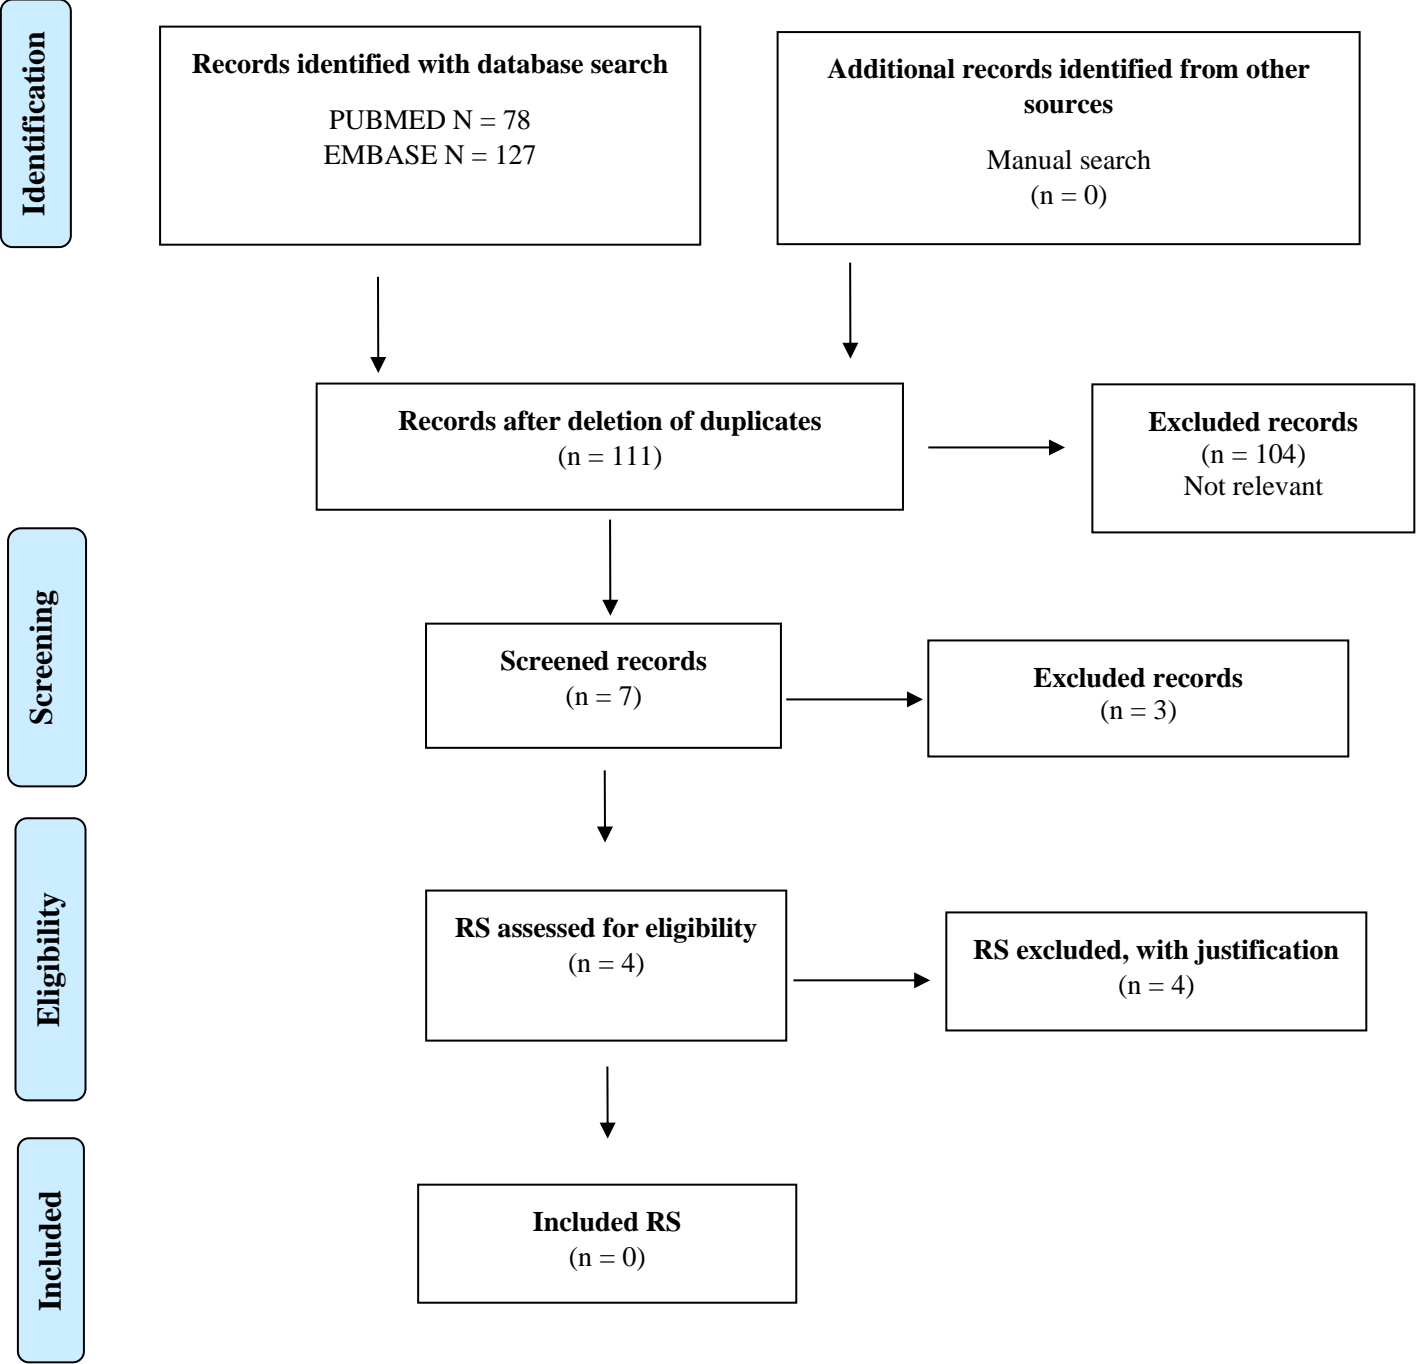

**S1.4. Algorithm for Studies search**

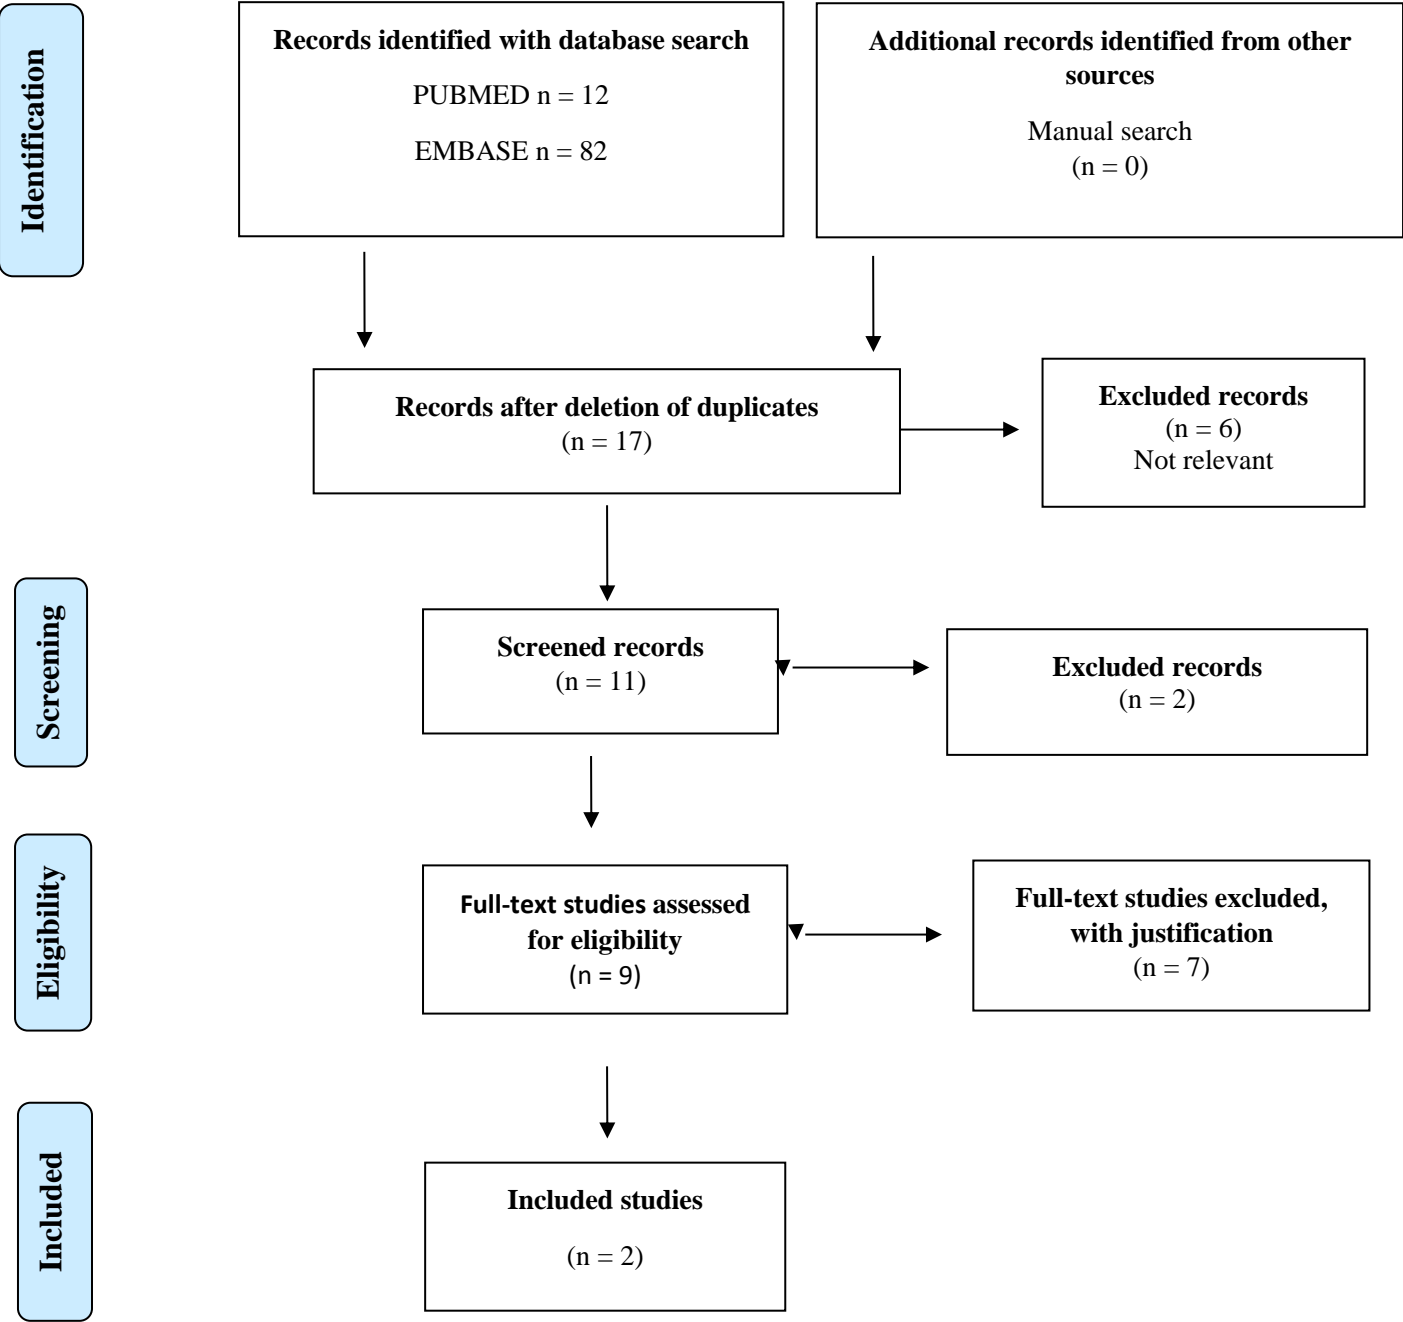

Supplement: MOESM1 [file 13052_2025_1894_MOESM1_ESM.pdf]
